# Supplementary material for: Safety and efficacy of self-expandable Evolut R vs. balloon-expandable Sapien 3 valves for transcatheter aortic valve implantation: A systematic review and meta-analysis
Source: PubMed Central journal article supplement — Exp Ther Med. 2019 Sep 12;18(5):3893–904. doi: 10.3892/etm.2019.8000 (PMC6777306; doi:10.3892/etm.2019.8000), 2019-09-12
Supplement: Supplementary_Data.pdf [file Supplementary_Data.pdf]

# NEWCASTLE-OTTAWA QUALITY ASSESSMENT SCALE

## COHORT STUDIES

([http://www.ohri.ca/programs/clinical\\_epidemiology/oxford.asp](http://www.ohri.ca/programs/clinical_epidemiology/oxford.asp))

|                                      | Selection | Comparability | Outcome |
|--------------------------------------|-----------|---------------|---------|
| Ben-Shoshan <i>et al</i> (18)        | ****      |               | *       |
| Rogers <i>et al</i> (8)              | ****      |               | *       |
| Eitan <i>et al</i> (17)              | ****      |               | *       |
| Finkelstein <i>et al</i> (20)        | ****      | *             | **      |
| Enriquez-Rodriguez <i>et al</i> (19) | ****      | *             | *       |

For the citation of references, please refer to the main text.

### Selection

- 1) Representativeness of the exposed cohort
  - a) Truly representative of the average \_\_\_\_\_ (describe) in the community \*
  - b) Somewhat representative of the average \_\_\_\_\_ in the community \*
  - c) Selected group of users e.g. nurses, volunteers
  - d) No description of the derivation of the cohort
- 2) Selection of the non exposed cohort
  - a) Drawn from the same community as the exposed cohort \*
  - b) Drawn from a different source
  - c) No description of the derivation of the non exposed cohort
- 3) Ascertainment of exposure
  - a) Secure record (e.g. surgical records) \*
  - b) Structured interview \*
  - c) Written self report
  - d) No description

- 4) Demonstration that outcome of interest was not present at start of study
  - a) Yes \*
  - b) No

### Comparability

- 1) Comparability of cohorts on the basis of the design or analysis
  - a) Study controls for \_\_\_\_\_ (select the most important factor) \*
  - b) Study controls for any additional factor \* (This criteria could be modified to indicate specific control for a second important factor.)

### Outcome

- 1) Assessment of outcome
  - a) Independent blind assessment \*
  - b) Record linkage \*
  - c) Self report
  - d) No description
- 2) Was follow-up long enough for outcomes to occur
  - a) Yes (select an adequate follow up period for outcome of interest) \*
  - b) No
- 3) Adequacy of follow up of cohorts
  - a) Complete follow up-all subjects accounted for \*
  - b) Subjects lost to follow up unlikely to introduce bias-small number lost -> \_\_\_% (select an adequate %) follow up, or description provided of those lost) \*
  - c) Follow up rate < \_\_\_% (select an adequate %) and no description of those lost
  - d) No statement
